# Supplementary material for: How many days are needed? Measurement reliability of wearable device data to assess physical activity
Source: PubMed Central journal article supplement (PMC9956594; doi:10.1371/journal.pone.0282162), 2023-02-24

Sedentary Time

LPA Time

MVPA Time

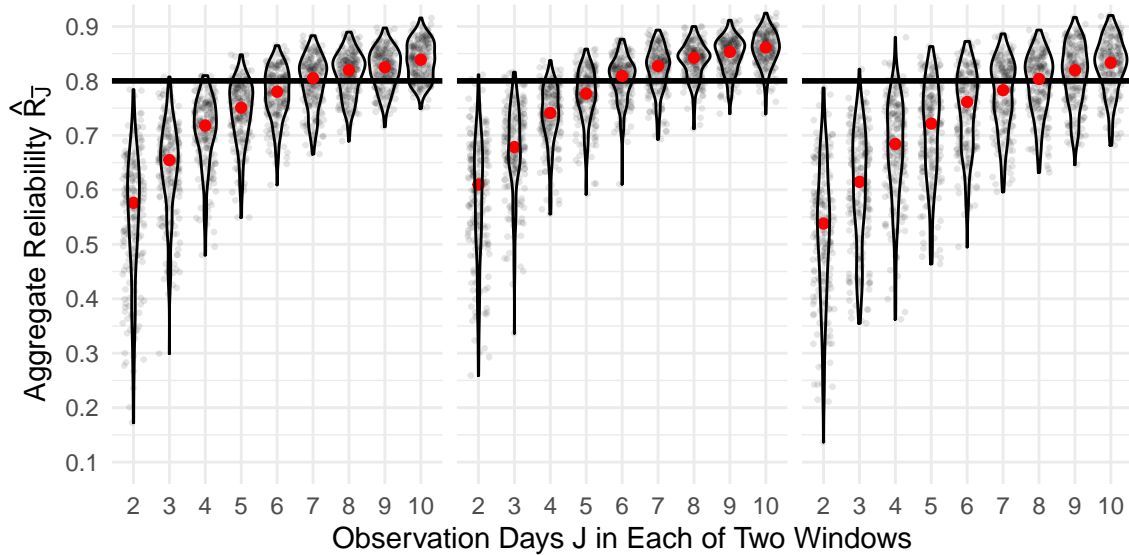

Supplement: pone.0282162.s003.pdf [file pone.0282162.s003.pdf]
